# Supplementary material for: Cyclic Amp-Dependent Resuscitation of Dormant Mycobacteria by Exogenous Free Fatty Acids
Source: PubMed Central journal article supplement (PMC3871856; doi:10.1371/journal.pone.0082914), 2013-12-23
Supplement: pone.0082914.s001.pdf [file pone.0082914.s001.pdf]

## Figure S1

### Primers used for quantitative real-time PCR.

MSMEG\_5700F (5'-CCTTTTGGCTCCTTGGGGTG-3')

MSMEG\_5700R (5'-GTCCACTCATAAGCGTCGAGG-3')

MSMEG\_5439BF (5'-CACAAGACCGTGACCCTCTC-3')

MSMEG\_5439BR (5'-GCGATCAGAAACCTCGAAGCC-3')

MSMEG\_4643F (5'-CCTTTCGTGCCTGACCGAGA-3')

MSMEG\_4643R (5'-GATGTTCTTCACTTCGTTCTTTC-3')

MSMEG\_4640F (5'-GCATGGCCGAAGTGCGGTG-3')

MSMEG\_4640R (5'-CAGGTCCAGGATGCCAGG-3')

### Primers used for cloning

| Name              | Sequence 5' - 3'                            | Enzyme          |
|-------------------|---------------------------------------------|-----------------|
| Up pMind-Ac       | <u>CGGATCCTGCAGCAGCTCGTCACTCAC</u><br>CACA  | <i>Bam</i> HI   |
| Low pMind-Ac      | <u>CACTAGTGCGGGGCAACGACGAGCTG</u><br>ACGGT  | <i>Spe</i> I    |
| Up $\Delta$ ac/L  | <u>CGGATCCC</u> GGCCCAGCGCCTTGAGA           | <i>Bam</i> HI   |
| Low $\Delta$ ac/L | <u>GAAAGCTTACCGGTCGAGGTAGGAGA</u><br>TGA    | <i>Hind</i> III |
| Up $\Delta$ ac/R  | <u>CAAGCTT</u> GCGCGAGGCGCTGGGAGAC<br>T     | <i>Hind</i> III |
| Low $\Delta$ ac/R | <u>GTCTAGAGGTGCATGTTGGCTGCGGGC</u><br>TTGAT | <i>Xba</i> I    |
